# Supplementary material for: Role of Vaccine Hesitancy, eHealth Literacy, and Vaccine Literacy in Young Adults’ COVID-19 Vaccine Uptake Intention in a Lower-Middle-Income Country
Source: MDPI journal article supplement (doi:10.3390/vaccines9121405), 2021-11-29
Supplement: s1 [file s1]

# Supplementary Materials:

**Table S1: OLS estimation measuring the impact of vaccine hesitancy on VUI**

OLS estimation measuring impact of vaccine hesitancy on vaccine uptake intention

| VARIABLES                            | (1)<br>VUI         | (2)<br>VUI         | (3)<br>VUI         |
|--------------------------------------|--------------------|--------------------|--------------------|
| Vaccine hesitancy                    |                    |                    |                    |
| Confidence                           | 0.94***<br>(0.10)  | 0.98***<br>(0.10)  | 0.71***<br>(0.11)  |
| Complacency                          | -0.11<br>(0.11)    | -0.11<br>(0.11)    | -0.16<br>(0.11)    |
| Constraints                          | -0.53***<br>(0.13) | -0.53***<br>(0.13) | -0.52***<br>(0.12) |
| Calculation                          | -0.62***<br>(0.11) | -0.54***<br>(0.11) | -0.45***<br>(0.11) |
| Collective responsibility            | 0.67***<br>(0.14)  | 0.58***<br>(0.14)  | 0.46***<br>(0.13)  |
| Sex (ref: Female)                    |                    |                    |                    |
| Male                                 |                    | -0.44<br>(0.27)    | -0.26<br>(0.26)    |
| Age (in years)                       |                    | 0.14***<br>(0.05)  | 0.15***<br>(0.05)  |
| COVID-19 affected (ref: No)          |                    |                    |                    |
| Yes                                  |                    |                    | -0.39<br>(0.53)    |
| Conspiracy theory believer (ref: No) |                    |                    |                    |
| Microchip implantation               |                    |                    | 0.91***<br>(0.28)  |
| Risk of being impotent               |                    |                    | -0.86**<br>(0.40)  |
| Vaccine-maker country (ref: UK)      |                    |                    |                    |
| India                                |                    |                    | 0.40<br>(0.25)     |
| Opinion leaders                      |                    |                    | 0.56***<br>(0.12)  |
| Constant                             | 5.24***<br>(1.00)  | 2.31<br>(1.45)     | 1.17<br>(1.42)     |
| Observations                         | 343                | 343                | 343                |
| R-squared                            | 0.40               | 0.42               | 0.49               |

Robust standard errors in parentheses

\*\*\* p<0.01, \*\* p<0.05, \* p<0.1

**Table S2: Probit estimation measuring the impact of vaccine hesitancy on VUI**

Probit model estimating impact of vaccine hesitancy on vaccine uptake intention

| VARIABLES                            | (1)<br>VUI         | (2)<br>VUI         | (3)<br>VUI         |
|--------------------------------------|--------------------|--------------------|--------------------|
| Vaccine hesitancy                    |                    |                    |                    |
| Confidence                           | 0.43***<br>(0.07)  | 0.47***<br>(0.07)  | 0.38***<br>(0.07)  |
| Complacency                          | -0.10<br>(0.07)    | -0.12*<br>(0.07)   | -0.16**<br>(0.07)  |
| Constraints                          | -0.23***<br>(0.07) | -0.23***<br>(0.07) | -0.24***<br>(0.07) |
| Calculation                          | -0.31***<br>(0.07) | -0.27***<br>(0.07) | -0.25***<br>(0.08) |
| Collective responsibility            | 0.31***<br>(0.09)  | 0.26***<br>(0.09)  | 0.22**<br>(0.10)   |
| Sex (ref: Female)                    |                    |                    |                    |
| Male                                 |                    | -0.15<br>(0.17)    | -0.03<br>(0.17)    |
| Age (in years)                       |                    | 0.09***<br>(0.03)  | 0.11***<br>(0.03)  |
| COVID-19 affected (ref: No)          |                    |                    |                    |
| Yes                                  |                    |                    | 0.40<br>(0.44)     |
| Conspiracy theory believer (ref: No) |                    |                    |                    |
| Microchip implantation               |                    |                    | 0.61***<br>(0.23)  |
| Risk of being impotent               |                    |                    | -0.43<br>(0.26)    |
| Vaccine-maker country (ref: UK)      |                    |                    |                    |
| India                                |                    |                    | 0.35**<br>(0.17)   |
| Opinion leaders                      |                    |                    | 0.30***<br>(0.07)  |
| Constant                             | 0.02<br>(0.60)     | -1.86**<br>(0.93)  | -3.08***<br>(1.00) |
| Observations                         | 343                | 343                | 343                |

Robust standard errors in parentheses

\*\*\* p&lt;0.01, \*\* p&lt;0.05, \* p&lt;0.1

**Table S3: OLS estimation measuring the impact of eHEALS on VUI**

| OLS estimation measuring impact of e-Heals on vaccine uptake intention |                   |                   |                    |
|------------------------------------------------------------------------|-------------------|-------------------|--------------------|
| VARIABLES                                                              | (1)<br>VUI        | (2)<br>VUI        | (3)<br>VUI         |
| eHEALS                                                                 | 0.10***<br>(0.02) | 0.11***<br>(0.02) | 0.07***<br>(0.02)  |
| Sex (ref: Female)                                                      |                   |                   |                    |
| Male                                                                   |                   | -0.50<br>(0.33)   | -0.14<br>(0.30)    |
| Age (in years)                                                         |                   | 0.16***<br>(0.05) | 0.14***<br>(0.05)  |
| COVID-19 affected (ref:<br>No)                                         |                   |                   |                    |
| Yes                                                                    |                   |                   | -0.67<br>(0.77)    |
| Conspiracy theory believer<br>(ref: No)                                |                   |                   |                    |
| Microchip implantation                                                 |                   |                   | 0.88***<br>(0.33)  |
| Risk of being impotent                                                 |                   |                   | -1.99***<br>(0.49) |
| Vaccine-maker country<br>(ref: UK)                                     |                   |                   |                    |
| India                                                                  |                   |                   | 0.27<br>(0.29)     |
| Opinion leaders                                                        |                   |                   | 0.89***<br>(0.13)  |
| Constant                                                               | 3.18***<br>(0.85) | -0.50<br>(1.46)   | -1.52<br>(1.32)    |
| Observations                                                           | 343               | 343               | 343                |
| R-squared                                                              | 0.06              | 0.09              | 0.31               |

Robust standard errors in parentheses

\*\*\* p&lt;0.01, \*\* p&lt;0.05, \* p&lt;0.1

**Table S4: Probit estimation measuring the impact of eHEALS on VUI**

| Probit model estimating impact of e-Heals on vaccine uptake intention |                    |                    |                    |
|-----------------------------------------------------------------------|--------------------|--------------------|--------------------|
| VARIABLES                                                             | (1)<br>VUI         | (2)<br>VUI         | (3)<br>VUI         |
| eHEALS                                                                | 0.04***<br>(0.01)  | 0.05***<br>(0.01)  | 0.04***<br>(0.01)  |
| Sex (ref: Female)                                                     |                    |                    |                    |
| Male                                                                  |                    | -0.15<br>(0.15)    | 0.01<br>(0.16)     |
| Age (in years)                                                        |                    | 0.07***<br>(0.02)  | 0.08***<br>(0.03)  |
| COVID-19 affected (ref:<br>No)                                        |                    |                    |                    |
| Yes                                                                   |                    |                    | 0.16<br>(0.39)     |
| Conspiracy theory believer<br>(ref: No)                               |                    |                    |                    |
| Microchip implantation                                                |                    |                    | 0.46**<br>(0.20)   |
| Risk of being impotent                                                |                    |                    | -0.84***<br>(0.25) |
| Vaccine-maker country<br>(ref: UK)                                    |                    |                    |                    |
| India                                                                 |                    |                    | 0.25<br>(0.16)     |
| Opinion leaders                                                       |                    |                    | 0.37***<br>(0.06)  |
| Constant                                                              | -1.10***<br>(0.36) | -2.87***<br>(0.70) | -4.05***<br>(0.78) |
| Observations                                                          | 343                | 343                | 343                |

Robust standard errors in parentheses

\*\*\* p&lt;0.01, \*\* p&lt;0.05, \* p&lt;0.1

**Table S5: OLS estimation measuring the impact of vaccine literacy on VUI**

| OLS estimation measuring impact of vaccine literacy on vaccine uptake intention |                   |                   |                    |
|---------------------------------------------------------------------------------|-------------------|-------------------|--------------------|
| VARIABLES                                                                       | (1)<br>VUI        | (2)<br>VUI        | (3)<br>VUI         |
| Vaccine literacy                                                                | -0.02<br>(0.02)   | -0.02<br>(0.02)   | -0.02<br>(0.02)    |
| Sex (ref: Female)                                                               |                   |                   |                    |
| Male                                                                            |                   | -0.36<br>(0.34)   | -0.01<br>(0.30)    |
| Age (in years)                                                                  |                   | 0.12**<br>(0.05)  | 0.12***<br>(0.05)  |
| COVID-19 affected (ref: No)                                                     |                   |                   |                    |
| Yes                                                                             |                   |                   | -0.59<br>(0.77)    |
| Conspiracy theory believer (ref: No)                                            |                   |                   |                    |
| Microchip implantation                                                          |                   |                   | 0.98***<br>(0.32)  |
| Risk of being impotent                                                          |                   |                   | -2.22***<br>(0.47) |
| Vaccine-maker country (ref: UK)                                                 |                   |                   |                    |
| India                                                                           |                   |                   | 0.23<br>(0.30)     |
| Opinion leaders                                                                 |                   |                   | 0.94***<br>(0.13)  |
| Constant                                                                        | 7.79***<br>(0.78) | 5.28***<br>(1.48) | 2.07<br>(1.38)     |
| Observations                                                                    | 343               | 343               | 343                |
| R-squared                                                                       | 0.00              | 0.02              | 0.29               |

Robust standard errors in parentheses

\*\*\* p&lt;0.01, \*\* p&lt;0.05, \* p&lt;0.1

**Table S6: Probit estimation measuring the impact of vaccine literacy on VUI**

| Probit model estimating impact of vaccine literacy on vaccine uptake intention |                  |                  |                    |
|--------------------------------------------------------------------------------|------------------|------------------|--------------------|
| VARIABLES                                                                      | (1)<br>VUI       | (2)<br>VUI       | (3)<br>VUI         |
| Vaccine literacy                                                               | -0.01<br>(0.01)  | -0.01<br>(0.01)  | -0.01<br>(0.01)    |
| Sex (ref: Female)                                                              |                  |                  |                    |
| Male                                                                           |                  | -0.09<br>(0.14)  | 0.07<br>(0.16)     |
| Age (in years)                                                                 |                  | 0.06**<br>(0.02) | 0.07***<br>(0.02)  |
| COVID-19 affected (ref: No)                                                    |                  |                  |                    |
| Yes                                                                            |                  |                  | 0.18<br>(0.39)     |
| Conspiracy theory believer (ref: No)                                           |                  |                  |                    |
| Microchip implantation                                                         |                  |                  | 0.51***<br>(0.19)  |
| Risk of being impotent                                                         |                  |                  | -0.96***<br>(0.24) |
| Vaccine-maker country (ref: UK)                                                |                  |                  |                    |
| India                                                                          |                  |                  | 0.23<br>(0.16)     |
| Opinion leaders                                                                |                  |                  | 0.39***<br>(0.06)  |
| Constant                                                                       | 0.78**<br>(0.34) | -0.31<br>(0.62)  | -1.96***<br>(0.72) |
| Observations                                                                   | 343              | 343              | 343                |

Robust standard errors in parentheses

\*\*\* p&lt;0.01, \*\* p&lt;0.05, \* p&lt;0.1
